# Supplementary material
Source: Frontiers journal article supplement (https://www.frontiersin.org/articles/134066)
Supplement: Presentation_2.PDF [file Presentation_2.PDF]

## Appendix 2. Description of SAR (focus group booklet)

| Name<br>Producer,<br>(country)                                        | Picture                                                                             | Type of robot         | Description                                                                                                                                                                                                                                                                                                                                                                                              |
|-----------------------------------------------------------------------|-------------------------------------------------------------------------------------|-----------------------|----------------------------------------------------------------------------------------------------------------------------------------------------------------------------------------------------------------------------------------------------------------------------------------------------------------------------------------------------------------------------------------------------------|
| <b>RobuLAB 10</b><br>Robosoft<br>(France)                             | 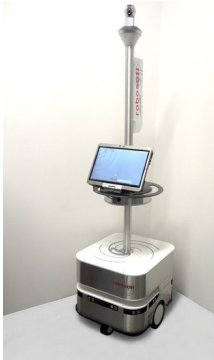   | Machine-like          | <ul style="list-style-type: none"> <li>- Mobile platform</li> <li>- Embarks a group of sensors and cameras for autonomous navigation,</li> <li>- Input devices include speech control and touch-screen</li> <li>- System programmed to provide cognitive and social support through different applications (e.g., task reminder, cognitive training, navigation support, communication tools)</li> </ul> |
| <b>Kompai</b><br>Robosoft<br>(France)                                 |   | Mechanical human-like | <ul style="list-style-type: none"> <li>- Same configuration as Robulab but with a different appearance (human-like head)</li> </ul>                                                                                                                                                                                                                                                                      |
| <b>Pearl</b><br>Carnegie Mellon University<br>(USA)                   |  | Mechanical human-like | <ul style="list-style-type: none"> <li>- Mobile platform</li> <li>- Designed to help older adults to navigate through a nursing facility</li> <li>- Provides advice, cognitive support, functional assistance</li> </ul>                                                                                                                                                                                 |
| <b>Mamoru</b><br>University of Tokyo<br>Toyota and Fujitsu<br>(Japan) |  | Mechanical human-like | <ul style="list-style-type: none"> <li>- Desktop elder-care robot</li> <li>- Designed to provide prompts and reminders (e.g., Item location, medication intake)</li> <li>- Uses a wide-angle camera to detect objects regardless of rotation, scale, or lighting conditions</li> </ul>                                                                                                                   |
| <b>EVE</b><br>PIXAR, DISNEY studios<br>(USA)                          |  | Mechanical human-like | <ul style="list-style-type: none"> <li>- Animated female robot from the film Wall-E</li> <li>- Mix between human and machine features</li> <li>- Emotions represented through facial expressions and voice</li> </ul>                                                                                                                                                                                    |

| Name<br>Producer,<br>(country)                                                      | Picture                                                                             | Type of robot          | Description                                                                                                                                                                                                                                                                                                                                                                                                |
|-------------------------------------------------------------------------------------|-------------------------------------------------------------------------------------|------------------------|------------------------------------------------------------------------------------------------------------------------------------------------------------------------------------------------------------------------------------------------------------------------------------------------------------------------------------------------------------------------------------------------------------|
| <b>Telenoid</b><br>Osaka<br>University,<br>ATR<br>(Japan)                           |    | Human-like             | <ul style="list-style-type: none"> <li>- Humanoid robot with minimal human appearance</li> <li>- High quality silicon human mimicking skin</li> <li>- Designed to be a communication device, with applications in remote work, education, and elderly care</li> <li>- Allows distant transmission of “human presence” (e.g., voice, face and head movements)</li> </ul>                                    |
| <b>Nexi</b><br>MIT Media<br>Lab<br>(USA)                                            |    | Human-like             | <ul style="list-style-type: none"> <li>- Mobile manipulator robot capable of social expression</li> <li>- Applications for personal robots and human-robot teamwork</li> <li>- Hands for manipulating objects, eyes (video cameras), ears (an array of microphones), 3-D infrared camera and laser rangefinder to support real-time tracking of objects, people, voices, and indoor navigation</li> </ul>  |
| <b>Geminoid F</b><br>Osaka<br>University,<br>ATR<br>(Japan)                         |   | Android                | <ul style="list-style-type: none"> <li>- Android that works as a substitute for clerks, when typical responses are required</li> <li>- Consists in three elements: a robot, a central controlling server, and a teleoperation interface</li> </ul>                                                                                                                                                         |
| <b>iCat</b><br>Philips<br>Electronics<br>(The Netherlands)                          |  | Mechanical animal-like | <ul style="list-style-type: none"> <li>- Cat-like appearance</li> <li>- Face expressing emotions</li> <li>- Aimed at functional assistance</li> <li>- Strongly relates to social interaction</li> </ul>                                                                                                                                                                                                    |
| <b>Paro</b><br>Intelligent<br>Systems<br>Research<br>Institute<br>(ISRI)<br>(Japan) |  | Animal-like            | <ul style="list-style-type: none"> <li>- Soft seal robot developed for robot therapy in older adults with cognitive impairment, and other populations with disabilities</li> <li>- Programmable behavior as well as a set of sensors (touch sensor, infrared sensor, stereoscopic vision and hearing).</li> <li>- Actuators include eyelids, upper body motors, front paw and hind limb motors.</li> </ul> |
